# Supplementary material
Source: publisher site journal article supplement (https://static.cambridge.org/content/id/urn:cambridge.org:id:article:S1368980020000051/resource/name/S1368980020000051supp002.pdf)
Supplement: Supplementary file 1 [file S1368980020000051supp002.pdf]

**Supplementary Table 1: Procedure to classify foods consistent with the Australian Guide to Healthy Eating**

| Question                                                                                                                           | Details                                                                                                                                                                                                                                                                                                                                                                                                                                                                                                                                                                                                                                                                                                                                                                                                                                                                                                                                                            | If yes...                                | If no or unsure... |
|------------------------------------------------------------------------------------------------------------------------------------|--------------------------------------------------------------------------------------------------------------------------------------------------------------------------------------------------------------------------------------------------------------------------------------------------------------------------------------------------------------------------------------------------------------------------------------------------------------------------------------------------------------------------------------------------------------------------------------------------------------------------------------------------------------------------------------------------------------------------------------------------------------------------------------------------------------------------------------------------------------------------------------------------------------------------------------------------------------------|------------------------------------------|--------------------|
| Q1. Is the product easily identifiable as a five food group food, or water?                                                        | <p>Vegetables - All fresh, frozen, canned and dried, but not fried</p> <p>Fruit - All fresh, frozen, canned, dried, and fruit juice</p> <p>Grains - Whole and rolled grains, flour, bread, pasta, noodles, breakfast cereals, including refined and whole grain varieties</p> <p>Lean meat, fish, and alternatives - All fresh, frozen and canned meat, poultry and fish; salt and fat reduced sausages; eggs, tofu, nuts and nut spreads, legumes, seeds</p> <p>Milk, yoghurt, cheese, and alternatives - Fresh, dried, evaporated or UHT milk, yoghurt, all cheese, and calcium-enriched alternatives</p> <p>Water</p>                                                                                                                                                                                                                                                                                                                                           | Classify into the appropriate food group | Go to Q2           |
| Q2. Is the product easily identifiable as a discretionary food, using the examples provided in the Eat for Health Educators Guide? | <p>Foods with higher added sugars - energy drinks, fruit drinks, honey, jams, marmalade, some sauces, sports drinks, sugar, confectionery, soft drinks, cordials, sweetened waters, iced tea, syrups</p> <p>Foods with higher saturated fat - bacon, ham, butter, cream, ghee, some tacos/nachos/enchiladas, commercially fried foods, commercial burgers, crisps, extruded snacks, dairy blends, frankfurts, chips, meat pie, pasties, pastry, pizza, processed meat, quiche, salami, mettwurst, sausages, some crackers, some sauces, spring roll</p> <p>Foods with higher saturated fat and added sugars - biscuits, cakes, chocolate, chocolate bars, dessert style custards, doughnuts, iced buns, ice cream, muesli bars, puddings, slices, some confectionery, some sauces, muffins, pastries, pies, crumbles</p> <p>Foods with high salt - marinades and sauces e.g. fish sauce, soy sauce; salty snack foods; spreads e.g. Vegemite; savoury biscuits</p> | Classify as discretionary                | Go to Q3           |

| Question                                                                                                                            | Details                                                                                                                                                                                                                                                                                                                                                                                                                                                                     | If yes...                                                                                          | If no or unsure...                                                     |
|-------------------------------------------------------------------------------------------------------------------------------------|-----------------------------------------------------------------------------------------------------------------------------------------------------------------------------------------------------------------------------------------------------------------------------------------------------------------------------------------------------------------------------------------------------------------------------------------------------------------------------|----------------------------------------------------------------------------------------------------|------------------------------------------------------------------------|
| Q3. Do the ABS principles for identifying discretionary foods identify this food as discretionary?                                  | <p>All milk drinks including flavoured milk</p> <p>All soft drinks including those with intense sweeteners</p> <p>All fruit drinks other than fruit juices</p> <p>Tea or coffee with added sugar</p> <p>Breakfast cereals without added fruit &gt; 30g sugar/100g</p> <p>Breakfast cereals with added fruit &gt; 35g sugar/100g</p> <p>All dry soup mixes</p> <p>Mixed dishes containing grains e.g. sandwiches, burgers, wraps, sushi, pizza &gt;5g saturated fat/100g</p> | <p>Classify as milk, yoghurt, cheese and alternatives</p> <p>Classify as discretionary</p>         | Go to Q4                                                               |
| Q4. Does the product contain any of the following: added saturated fat, added salt, or added sugar?                                 | <p>added saturated fat e.g. butter, cream, coconut milk/cream, mayonnaise</p> <p>added salt e.g. marinades, soy/fish sauce, stock/bouillon</p> <p>added sugar or other sweeteners e.g. honey, syrups</p>                                                                                                                                                                                                                                                                    | Go to Q5                                                                                           | Classify as 'mixed product using mainly five food group foods'         |
| Q5. Does the nutrition content of the product meet any of the following criteria from the Eat for Health Educators Guide?           | <p>-- total fat &gt; 10g per 100g</p> <p>-- saturated fat &gt; 3g per 100g</p> <p>-- total sugar &gt; 15g per 100g</p> <p>-- sodium &gt; 400mg per 100g</p>                                                                                                                                                                                                                                                                                                                 | Classify as discretionary or 'mixed product high in fat salt or sugar'                             | Go to Q6                                                               |
| Q6. Is there enough information provided to classify the product as five food group foods or mixed product using mainly core foods? | <p>For products where only front-of-pack information is available, products will be classified as discretionary/ mixed product high in fat salt or sugar unless there is sufficient information to classify it as five food group food/ mixed product using mainly five food group foods</p>                                                                                                                                                                                | Classify into the appropriate food group, or as 'mixed product using mainly five food group foods' | Classify as discretionary or 'mixed product high in fat salt or sugar' |
